# Supplementary material for: Mo(vi) complex supported on Fe3O4 nanoparticles: magnetically separable nanocatalysts for selective oxidation of sulfides to sulfoxides
Source: Royal Society of Chemistry journal article supplement (doi:10.1039/c5ra08653a), 2015-01-01
Supplement: c5ra08653a1.pdf [file c5ra08653a1.pdf]

## Supplementary data

---

# **Mo(VI) complex supported on Fe<sub>3</sub>O<sub>4</sub> nanoparticles: Magnetically separable nanocatalysts for selective oxidation of sulfides to sulfoxides**

Hasan Keypour<sup>#,a</sup>, Masomeh Balali<sup>a</sup>, Mohammad Mehdi Haghdooost<sup>b</sup>, Mojtaba Bagherzadeh<sup>\*,b</sup>

<sup>a</sup>Chemistry Department, Bu-Ali Sina University, Hamedan Department of Chemistry, Bu-Ali Sina University, Hamadan.

E-mail: [haskey1@yahoo.com](mailto:haskey1@yahoo.com)

<sup>b</sup>Chemistry Department, Sharif University of Technology, Tehran, Iran.

Email: [bagherzadeh@sharif.edu](mailto:bagherzadeh@sharif.edu)

## Supplementary data

---

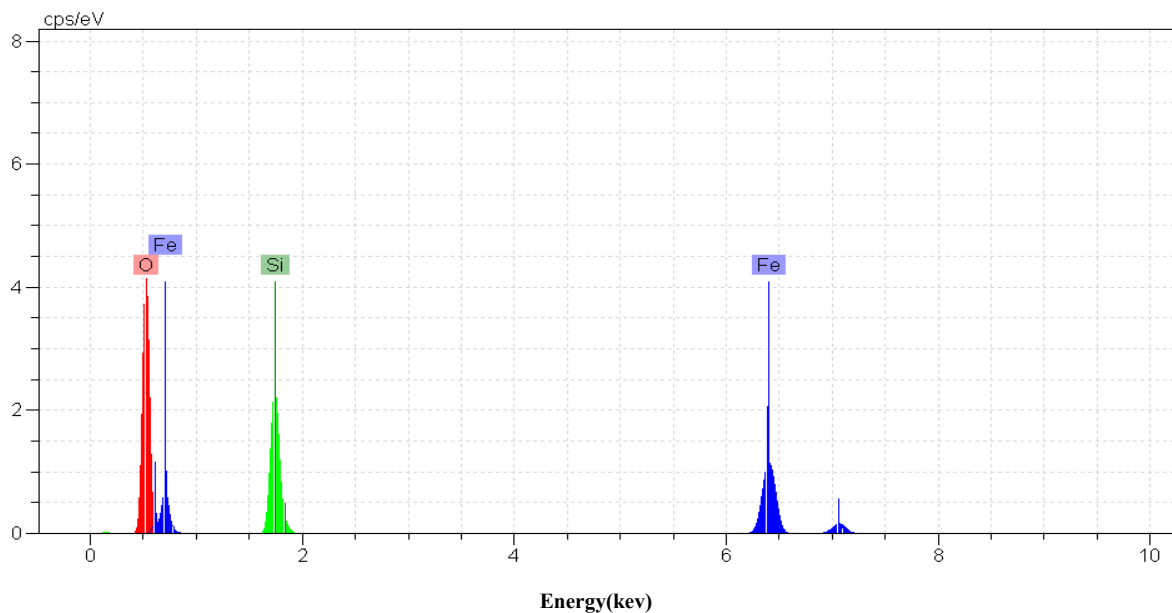

**Fig. S1.** Energy dispersive X-ray (EDX) analysis of the  $\text{Fe}_3\text{O}_4@\text{SiO}_2$  (2) nanoparticles showed expected elements such as iron, oxygen and silicon.

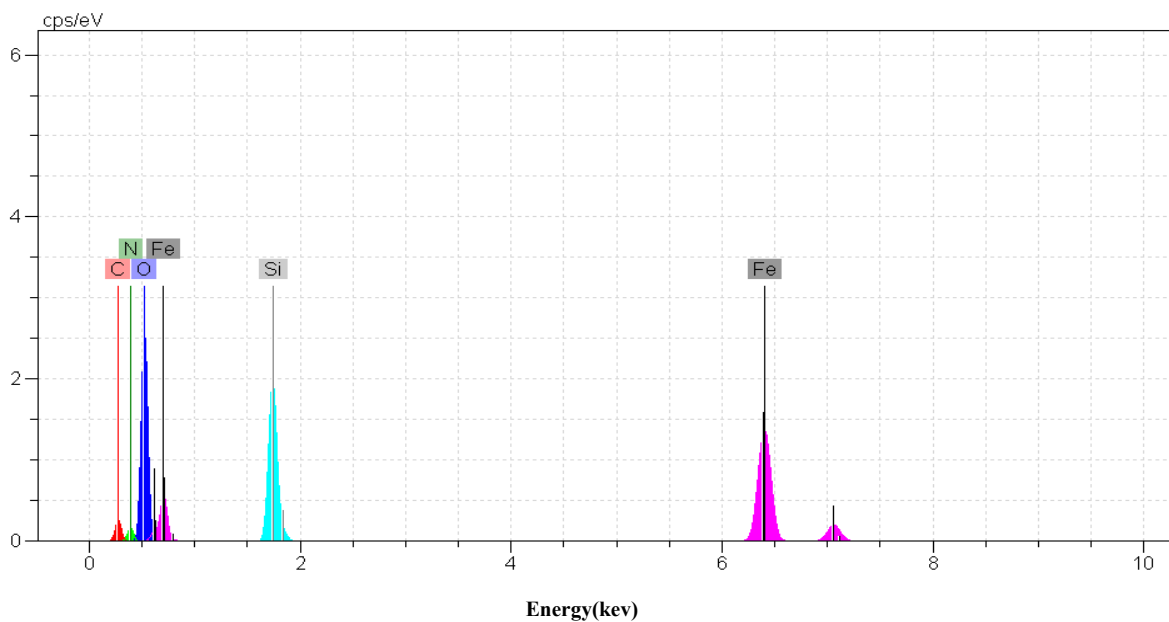

**Fig. S2.** Energy dispersive X-ray (EDX) analysis of the  $\text{Fe}_3\text{O}_4@\text{SiO}_2\text{-NH}_2$  (3) nanoparticles showed expected elements such as iron, oxygen, silicon, carbon and nitrogen.

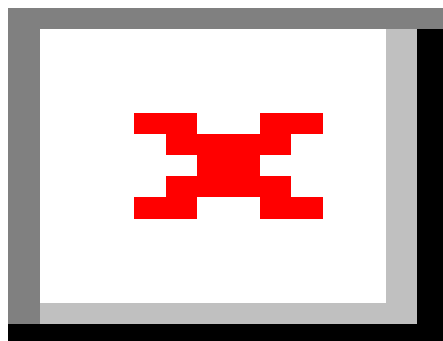

**Fig. 10.** The XPS spectrum of  $\text{Fe}_3\text{O}_4@\text{SiO}_2\text{-SB-Mo}$  nanoparticle.
